# Supplementary material
Source: MDPI journal article supplement (https://www.mdpi.com/2073-4441/14/4/569)
Supplement: s1 [file s1]

# Dissolved Potentially Toxic Elements (PTEs) in Relation to Depuration Plant Outflows in Adriatic Coastal Waters: A Two Year Monitoring Survey

Federico Girolametti <sup>1,\*</sup>, Matteo Fanelli <sup>1</sup>, Behixhe Ajdini <sup>1</sup>, Cristina Truzzi <sup>1</sup>, Silvia Illuminati <sup>1,\*</sup>, Sabina Susmel <sup>2</sup>, Mauro Celussi <sup>3</sup>, Jadranka Šangulin <sup>4</sup> and Anna Annibaldi <sup>1</sup>

<sup>1</sup> Department of Life and Environmental Sciences, Università Politecnica delle Marche, Via Brecce Bianche, 60131 Ancona, Italy; m.fanelli@pm.univpm.it (M.F.); b.ajdini@pm.univpm.it (B.A.); c.truzzi@univpm.it (C.T.); a.annibaldi@univpm.it (A.A.)

<sup>2</sup> Department of Agricultural, Food, Environmental and Animal Sciences (Di4A), University of Udine, Via Sondrio 2/A, 33100 Udine, Italy; sabina.susmel@uniud.it

<sup>3</sup> National Institute of Oceanography and Applied Geophysics—OGS, Oceanography Division, Via A. Piccard, 54, 34151 Trieste, Italy; mcelussi@inogs.it

<sup>4</sup> Department of Health Ecology, Institute of Public Health, Kolovare 2, 23000 Zadar, Croatia; jsangulin@zjz-zadar.hr

\* Correspondence: f.girolametti@pm.univpm.it (F.G.); s.illuminati@univpm.it (S.I.); Tel.: +39-0712204302 (F.G.); +39-0714981 (S.I.)

**Table S1.** Instrumental parameters of Atomic Fluorescence Spectrometer (AFS) for water analyses.

| Instrumental parameter.                             | Cd                               | Hg                               | As                               |
|-----------------------------------------------------|----------------------------------|----------------------------------|----------------------------------|
| PMT (Volts)                                         | 280                              | 275                              | 320                              |
| Lamp current (mA)                                   | 60/30                            | 30/0                             | 60/30                            |
| Carrier Gas (mL min <sup>-1</sup> )                 | 500                              | 300                              | 300                              |
| Shield Gas (mL min <sup>-1</sup> )                  | 800                              | 1000                             | 800                              |
| Reading time (s)                                    | 15                               | 15                               | 15                               |
| Delay Time (s)                                      | 0.5                              | 0.5                              | 0.5                              |
| Blank Judgement Value (if)                          | 10                               | 5                                | 10                               |
| Torch height (mm)                                   | 8                                | 10                               | 8                                |
| IFS Step (s x rpm, a=analyte; c=carrier; r=reading) | (a) 10 x 100<br>(c) (r) 16 x 120 | (a) 10 x 100<br>(c) (r) 16 x 120 | (a) 10 x 100<br>(c) (r) 18 x 120 |

**Table S2.** Instrumental LOD and LOQ of Atomic Fluorescence Spectrometer (AFS) and accuracy control test.

| Element | LOD<br>(µg L <sup>-1</sup> ) | LOQ<br>(µg L <sup>-1</sup> ) | CRM    |                                          |                                         |
|---------|------------------------------|------------------------------|--------|------------------------------------------|-----------------------------------------|
|         |                              |                              | Name   | Certified value<br>(µg L <sup>-1</sup> ) | Measured value<br>(µg L <sup>-1</sup> ) |
| Hg      | 0.0006                       | 0.006                        | QC3163 | 17.6±0.314                               | 17.3±0.2                                |
| Cd      | 0.0005                       | 0.005                        | NASS-6 | 0.0311±0.0019                            | 0.031±0.008                             |
| As      | 0.01                         | 0.13                         | SLEW-3 | 1.36±0.09                                | 1.47±0.27                               |

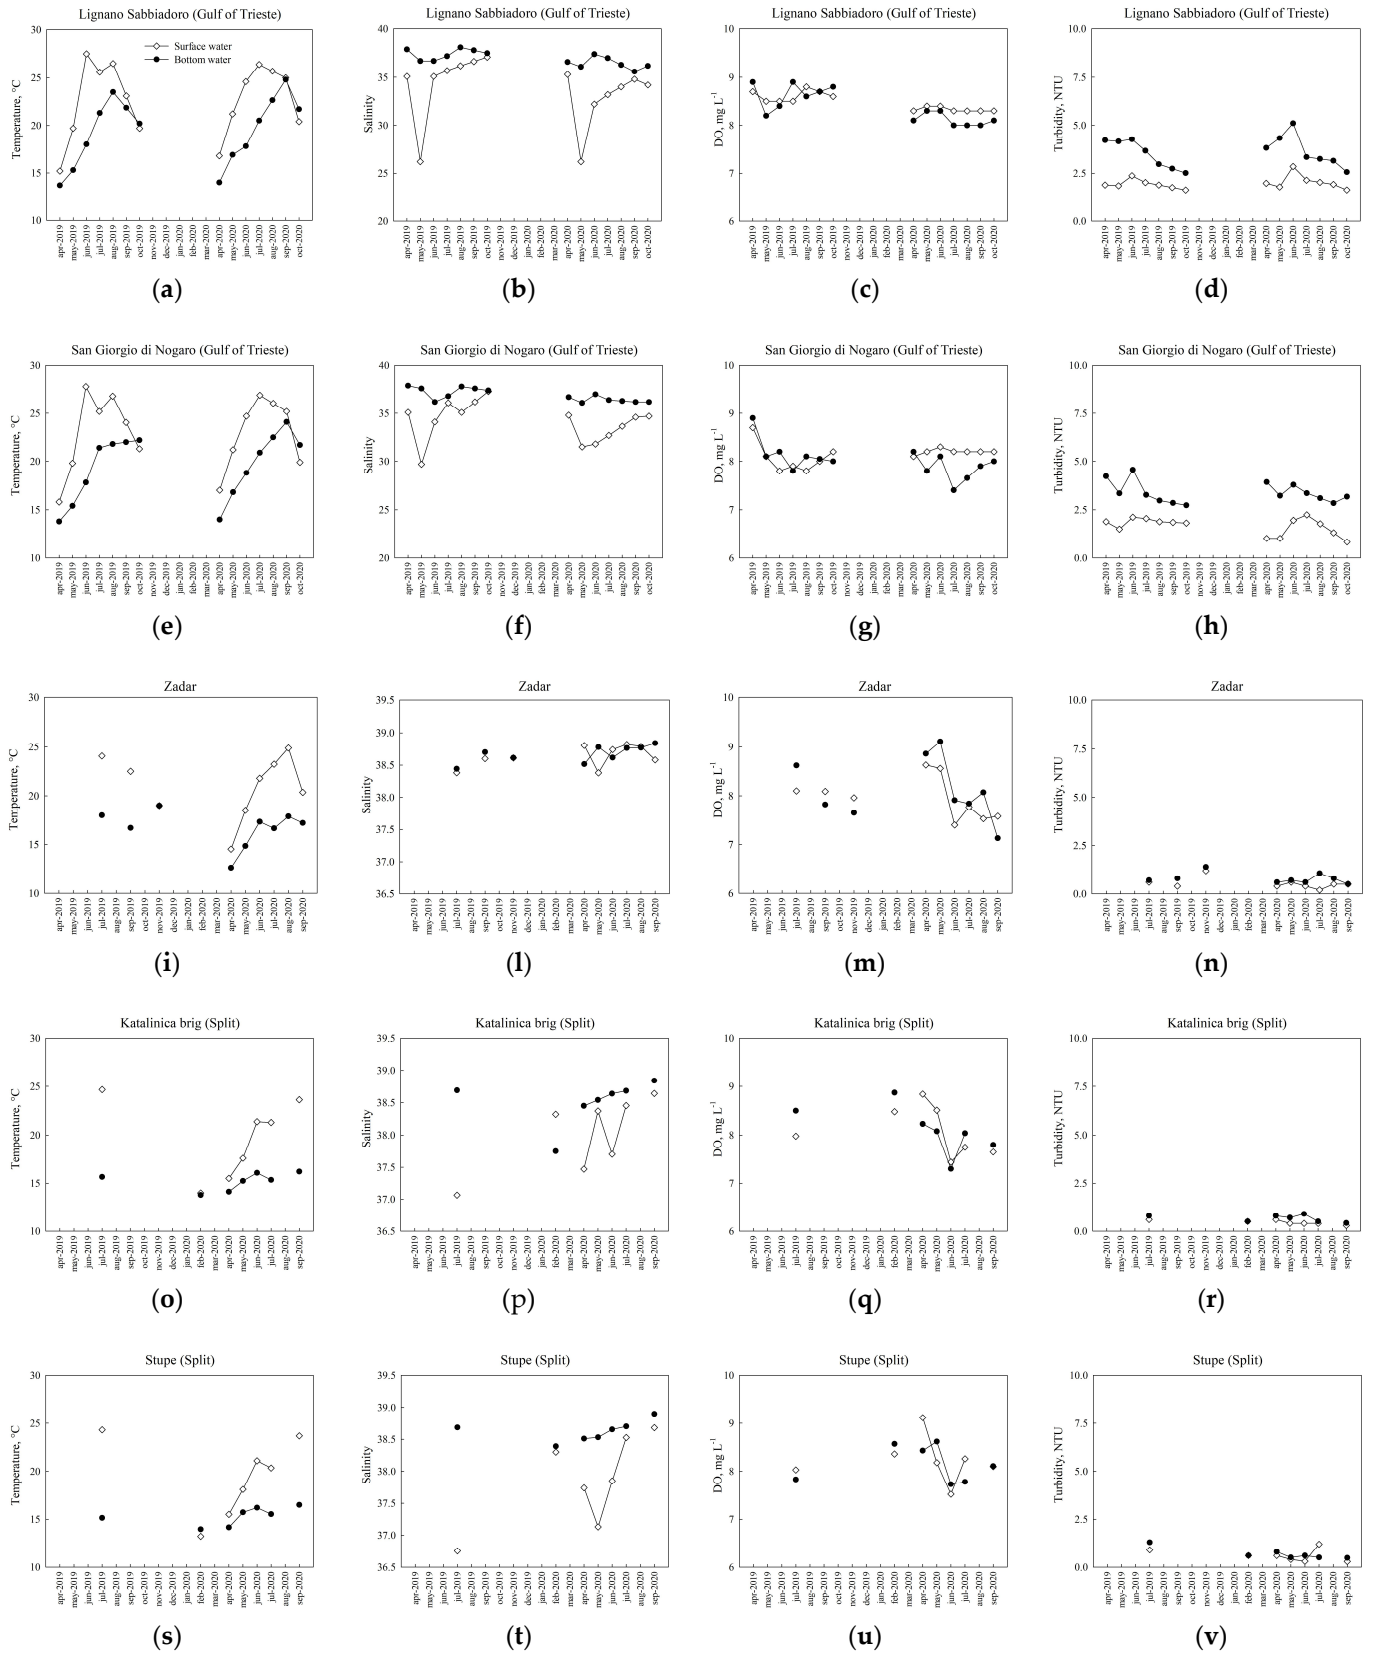

**Figure S1.** CTD parameters recorded in Lignano Sabbiadoro (a, b, c, d); San Giorgio di Nogaro (e, f, g, h); Zadar (i, l, m, n); Katalinica brig (o, p, q, r) and Stupe (s, t, u, v)

**Table S3.** Principal Component Analysis. Eigenvalues, explained and cumulative variance, loadings of the variables for the first two PCs.

|                           | Principal Components |        |
|---------------------------|----------------------|--------|
|                           | 1                    | 2      |
| <i>Variance explained</i> |                      |        |
| Eigenvalues               | 5.482                | 1.072  |
| % of variance             | 78.312               | 15.318 |
| Cumulative %              | 78.312               | 93.630 |
| <i>Factor loadings</i>    |                      |        |
| Lignano Sabbiadoro        | 2.970                | 1.045  |
| San Giorgio di Nogaro     | 2.108                | -1.193 |
| Zadar Upov Centar         | -1.511               | -0.998 |
| Katalinića brig           | -1.674               | -0.328 |
| Stupe                     | -1.892               | -0.818 |
